# Supplementary material
Source: publisher site journal article supplement (https://www.dovepress.com/article/387134)
Supplement: Supplementary file 1 [file get_supplementary_file.php]

Additional Table 1: Concordance between mNGS and BALF culture for pathogen detection and adjudication classification of mNGS results.

| **PT No** | **group** | **proved pathogen** | **culture1** | **culture2** | **mNGS1** | **mNGS2** | **concordance** | **match** | **adjudication classification** |
| --- | --- | --- | --- | --- | --- | --- | --- | --- | --- |
| PT1 | Non-LRTIs | **/** | negative | / | positive | Tropheryma whipplei | mNGS-positive | / | / |
| PT2 | Non-LRTIs | **/** | negative | / | negative | / | double-negative | / | / |
| PT3 | Non-LRTIs | **/** | negative | / | positive | P.aeruginosa | mNGS-positive | / | / |
| PT4 | Non-LRTIs | **/** | negative | / | negative | / | double-negative | / | / |
| PT5 | LRTIs | **/** | positive | Proteus mirabilis | positive | S.pneumoniae+Proteus mirabilis+Nocardia+CMV | double-positive | partly-match | culture and mNGS |
| PT6 | Non-LRTIs | **/** | negative | / | negative | / | double-negative | / | / |
| PT7 | LRTIs | **/** | negative | / | negative | / | double-negative | / | double negative |
| PT8 | LRTIs | **/** | positive | Aspergillus | positive | Aspergillus | double-Positive | match | culture and mNGS |
| PT9 | LRTIs | **/** | negative | / | positive | K.pneumoniae+EBV | mNGS-positive | / | mNGS only probable |
| PT10 | LRTIs | **/** | negative | / | positive | Legionella pneumophila+NTM+Pneumocystis jirovecii+EBV | mNGS-positive | / | mNGS only probable |
| PT11 | Non-LRTIs | **/** | negative | / | negative | / | double-negative | / | / |
| PT12 | LRTIs | **Sputum culture: Candida** | positive | Candida | positive | S.pneumoniae+Candida+EBV | double-positive | partly-match | culture and mNGS |
| PT13 | LRTIs | **/** | negative | / | negative | / | double-negative | / | double negative |
| PT14 | LRTIs | **Pathology: MTB** | negative | / | positive | MTB | mNGS-positive | / | other tests and mNGS |
| PT15 | LRTIs | **/** | negative | / | positive | S.pneumoniae+EBV | mNGS-positive | / | mNGS only possible |
| PT16 | LRTIs | **/** | negative | / | positive | S.pneumoniae+Stenotrophomonas maltophilia+CMV+EBV | mNGS-positive | / | mNGS only possible |
| PT17 | LRTIs | **/** | negative | / | negative | / | double-negative | / | double negative |
| PT18 | LRTIs | **/** | negative | / | positive | Legionella pneumophila | mNGS-positive | / | mNGS only probable |
| PT19 | LRTIs | **/** | negative | / | positive | MTB | mNGS-positive | / | mNGS only probable |
| PT20 | LRTIs | **/** | negative | / | positive | Acinetobacter radioresistens | mNGS-positive | / | mNGS only unlikely (likely colonization) |
| PT21 | LRTIs | **/** | negative | / | positive | S.pneumoniae | mNGS-positive | / | mNGS only possible |
| PT22 | LRTIs | **/** | negative | / | positive | S.pneumoniae+Haemophilus influenzae+Haemophilus parainfluenzae | mNGS-positive | / | mNGS only probable |
| PT23 | Non-LRTIs | **/** | positive | Rhizobium radiobacter | positive | Prevotella melaninogenica | double-Positive | mismatch | / |
| PT24 | LRTIs | **Sputum culture: Klebsiella pneumoniae** | positive | Enterobacter cloacae complex+Klebsiella pneumoniae | positive | Klebsiella pneumoniae | double-Positive | partly-match | culture and mNGS |
| PT25 | Non-LRTIs | **/** | positive | Pseudomonas putida | positive | Pseudomonas putida | double-positive | match | / |
| PT26 | Non-LRTIs | **/** | negative | / | negative | / | double-negative | / | / |
| PT27 | LRTIs | **/** | negative | / | positive | Nocardia | mNGS-positive | / | mNGS only probable |
| PT28 | LRTIs | **/** | negative | / | positive | MTB | mNGS-positive | / | mNGS only probable |
| PT29 | LRTIs | **/** | positive | Achromobacter xylosoxidans | positive | Achromobacter xylosoxidans | double-positive | match | culture and mNGS |
| PT30 | LRTIs | **BALF Aspergillus PCR: +** | negative | / | positive | Tropheryma whipplei | mNGS-positive | / | other tests and mNGS |
| PT31 | LRTIs | **Pathology: MTB** | negative | / | positive | MTB | mNGS-positive | / | other tests and mNGS |
| PT32 | LRTIs | **/** | negative | / | positive | NTM+Pseudomonas aeruginosa | mNGS-positive | / | mNGS only probable |
| PT33 | LRTIs | **/** | negative | / | positive | P.aeruginosa+CMV | mNGS-positive | / | mNGS only probable |
| PT34 | LRTIs | **/** | negative | / | positive | P.aeruginosa+Aspergillus | mNGS-positive | / | mNGS only probable |
| PT35 | Non-LRTIs | **/** | negative | / | negative | / | double-negative | / | / |
| PT36 | LRTIs | **/** | negative | / | negative | / | double-negative | / | double negative |
| PT37 | LRTIs | **/** | negative | / | positive | Tropheryma whipplei | mNGS-positive | / | mNGS only unlikely |
| PT38 | LRTIs | **Pathology: NTM** | negative | / | positive | NTM | mNGS-positive | / | other tests and mNGS |
| PT39 | LRTIs | **/** | negative | / | positive | S.pneumoniae+Nocardia | mNGS-positive | / | mNGS only probable |
| PT40 | LRTIs | **Pathology: Cryptococcus neoformans** | negative | / | positive | Cryptococcus neoformans | mNGS-positive | / | other tests and mNGS |
| PT41 | LRTIs | **Cryptococcus neoformans PCR: +** | negative | / | negative | / | double-negative | / | other tests only |
| PT42 | LRTIs | **/** | positive | Candida | positive | Candida+Chlamydophila psittaci | double-positive | partly-match | culture and mNGS |
| PT43 | LRTIs | **/** | negative | / | positive | Haemophilus influenzae+Haemophilus parainfluenzae | mNGS-positive | / | mNGS only possible |
| PT44 | LRTIs | **Sputum culture: Klebsiella pneumoniae; MTB PCR: +** | negative | / | negative | / | double-negative | / | culture and other tests |
| PT45 | LRTIs | **BALF MTB PCR: +** | negative | / | positive | S.pneumoniae | mNGS-positive | / | other tests and mNGS |
| PT46 | LRTIs | **/** | negative | / | negative | / | double-negative | / | double negative |
| PT47 | LRTIs | **/** | negative | / | negative | / | double-negative | / | double negative |
| PT48 | LRTIs | **/** | negative | / | positive | Schizophyllum commune | mNGS-positive | / | mNGS only probable |
| PT49 | LRTIs | **/** | negative | / | positive | Streptococcus mitis+S.pneumoniae | mNGS-positive | / | mNGS only possible |
| PT50 | LRTIs | **/** | negative | / | positive | Stenotrophomonas maltophilia | mNGS-positive | / | mNGS only unlikely |
| PT51 | LRTIs | **Sputum culture: Klebsiella pneumoniae** | negative | / | negative | / | double-negative | / | sputum culture only |
| PT52 | Non-LRTIs | **/** | negative | / | negative | / | double-negative | / | / |
| PT53 | LRTIs | **/** | negative | / | negative | / | double-negative | / | double negative |
| PT54 | LRTIs | **/** | negative | / | negative | / | double-negative | / | double negative |
| PT55 | LRTIs | **/** | negative | / | negative | / | double-negative | / | double negative |
| PT56 | LRTIs | **/** | negative | / | negative | / | double-negative | / | double negative |
| PT57 | Non-LRTIs | **/** | negative | / | positive | Sphingomonas paucimobilis+Haemophilus influenzae | mNGS-positive | / | / |
| PT58 | LRTIs | **Pathology: MTB** | negative | / | positive | MTB | mNGS-positive | / | other tests and mNGS |
| PT59 | LRTIs | **/** | negative | / | positive | S.pneumoniae+CMV | mNGS-positive | / | mNGS only probable |
| PT60 | Non-LRTIs | **/** | negative | / | negative | / | double-negative | / | / |
| PT61 | Non-LRTIs | **/** | negative | / | negative | / | double-negative | / | / |
| PT62 | LRTIs | **/** | negative | / | positive | Haemophilus influenzae+Haemophilus parainfluenzae+S.pneumoniae | mNGS-positive | / | mNGS only probable |
| PT63 | Non-LRTIs | **/** | negative | / | negative | / | double-negative | / | / |
| PT64 | Non-LRTIs | **/** | negative | / | negative | / | double-negative | / | / |
| PT65 | LRTIs | **/** | negative | / | positive | MTB | mNGS-positive | / | mNGS only probable |
| PT66 | LRTIs | **/** | negative | / | positive | S.pneumoniae+Aspergillus | mNGS-positive | / | mNGS only probable |
| PT67 | LRTIs | **/** | negative | / | negative | / | double-negative | / | double negative |
| PT68 | LRTIs | **/** | negative | / | positive | Cryptococcus neoformans | mNGS-positive | / | mNGS only probable |
| PT69 | Non-LRTIs | **/** | negative | / | negative | / | double-negative | / | / |
| PT70 | LRTIs | **Pathology: Cryptococcus neoformans** | positive | S.pneumoniae | positive | S.pneumoniae | double-positive | match | other tests only |
| PT71 | LRTIs | **/** | negative | / | negative | / | double-negative | / | double negative |
| PT72 | LRTIs | **/** | negative | / | positive | Klebsiella pneumoniae | mNGS-positive | / | mNGS only probable |
| PT73 | LRTIs | **/** | negative | / | positive | Pseudomonas aeruginosa | mNGS-positive | / | mNGS only probable |
| PT74 | LRTIs | **Pathology: MTB** | negative | / | positive | MTB | mNGS-positive | / | other tests and mNGS |
| PT75 | LRTIs | **Pathology: MTB** | negative | / | positive | MTB | mNGS-positive | / | other tests and mNGS |
| PT76 | LRTIs | **Sputum culture: Pseudomonas aeruginosa** | positive | Pseudomonas aeruginosa | positive | Pseudomonas aeruginosa | double-positive | match | culture and mNGS |
| PT77 | LRTIs | **/** | negative | / | positive | MTB+Aspergillus | mNGS-positive | / | mNGS only probable |
| PT78 | Non-LRTIs | **/** | negative | / | negative | / | double-negative | / | / |
| PT79 | LRTIs | **Pathology: Nocardia** | negative | / | positive | Nocardia | mNGS-positive | / | other tests and mNGS |
| PT80 | Non-LRTIs | **/** | negative | / | negative | / | double-negative | / | / |
| PT81 | LRTIs | **sputum culture: Enterobacter cloacae** | negative | / | positive | NTM | mNGS-positive | / | culture and mNGS |
| PT82 | Non-LRTIs | **/** | negative | / | negative | / | double-negative | / | / |
| PT83 | LRTIs | **/** | negative | / | positive | Tropheryma whipplei | mNGS-positive | / | mNGS only probable |
| PT84 | LRTIs | **Sputum culture: Pseudomonas aeruginosa** | positive | Pseudomonas aeruginosa | positive | Pseudomonas aeruginosa | double-positive | match | culture and mNGS |
| PT85 | LRTIs | **Pathology: MTB** | negative | / | positive | Pseudomonas aeruginosa+MTB | mNGS-positive | / | other tests and mNGS |
| PT86 | LRTIs | **/** | negative | / | negative | / | double-negative | / | double negative |
| PT87 | LRTIs | **/** | negative | / | positive | Cryptococcus neoformans | mNGS-positive | / | mNGS only probable |
| PT88 | Non-LRTIs | **/** | negative | / | negative | / | double-negative | / | / |
| PT89 | Non-LRTIs | **/** | negative | / | negative | / | double-negative | / | / |
| PT90 | Non-LRTIs | **/** | negative | / | negative | / | double-negative | / | / |
| PT91 | LRTIs | **/** | positive | Nocardia | positive | Nocardia | double-positive | match | culture and mNGS |
| PT92 | Non-LRTIs | **/** | negative | / | negative | / | double-negative | / | / |
| PT93 | Non-LRTIs | **/** | negative | / | negative | / | double-negative | / | / |
| PT94 | LRTIs | **/** | positive | Pseudomonas aeruginosa | positive | Pseudomonas aeruginosa | double-positive | match | culture and mNGS |
| PT95 | LRTIs | **/** | positive | Aspergillus | positive | Aspergillus+Cryptococcus neoformans | double-positive | partly-match | culture and mNGS |
| PT96 | LRTIs | **/** | negative | / | positive | MTB+NTM+CMV | mNGS-positive | / | mNGS only probable |
| PT97 | LRTIs | **Pathology: MTB** | negative | / | positive | MTB | mNGS-positive | / | other tests and mNGS |
| PT98 | LRTIs | **/** | negative | / | negative | / | double-negative | / | double negative |
| PT99 | LRTIs | **Sputum culture: candida** | negative | / | positive | Haemophilus influenzae+candida+Pneumocystis jirovecii | mNGS-positive | / | culture and mNGS |
| PT100 | Non-LRTIs | **/** | negative | / | positive | S.pneumoniae | mNGS-positive | / | / |
| PT101 | LRTIs | **/** | positive | Acinetobacter ursingii | positive | Acinetobacter ursingii | double-positive | match | culture and mNGS |
| PT102 | Non-LRTIs | **/** | negative | / | negative | / | double-negative | / | / |
| PT103 | Non-LRTIs | **/** | positive | Serratia marcescens | negative | / | culture-positive | / | / |
| PT104 | Non-LRTIs | **/** | negative | / | negative | / | double-negative | / | / |
| PT105 | LRTIs | **/** | positive | Serratia marcescens | positive | Serratia marcescens+Stenotrophomonas maltophilia | double-positive | partly-match | culture and mNGS |
| PT106 | LRTIs | **/** | negative | / | negative | / | double-negative | / | double negative |

**Additional Table 2** the enrolled 77 LRTIs patients for mNGS and conventional laboratory-based microbiological testing.

| Patient ID | Clinical  diagnosis | BALF Culture results | Pathology results | Acid-resistant staining | TSPOT | Xpert MTB | GM test | mNGS (number of unique reads) | Other results |
| --- | --- | --- | --- | --- | --- | --- | --- | --- | --- |
| NO.5 | Lower Respiratory Tract Infection | *Proteus mirabilis* | Focal alveolar hemorrhage, mild fibrosis with few inflammatory cells in the interstitium, and a little inflammatory exudate necrosis; no tumor cells were seen. | Negative | / | Negative | Negative | *Streptococcus pneumoniae* (95)*,*  *Proteus mirabilis* (43),  *Nocardia abscessus* (32)  *Human betaherpesvirus 5* (3330) | Negative |
| NO.7 | Lower Respiratory Tract Infection | Negative | Alveolar septal fibrous hyperplasia with a little chronic inflammatory cell infiltration; No tumor cells were seen. | Negative | / | Negative | Negative | Negative | Negative |
| NO.8 | Lower Respiratory Tract Infection | *Aspergillus* | Airway mucosa chronic inflammation; No tumor cells were seen. | Negative | / | Negative | Positive | *Aspergillus terreus*  (65)*,*  *Aspergillus flavus*  *(*9) | Negative |
| NO.9 | Lower Respiratory Tract Infection | Negative | Local alveolar septa widened, fibrous tissue hyperplasia, lymphocyte infiltration, and a large amount of necrotic tissue and purulent exudate | Negative | / | Negative | Negative | *Klebsiella pneumoniae* (344)*,*  *Human gammaherpesvirus 4* (231) | Negative |
| NO.10 | Legionella pneumophila pneumonia, Cryptococcal pneumonia | Negative | Alveolar septum was widened, acute and chronic inflammatory cell infiltration in the interstitium, silver hexamine staining negative; no tumor cells were seen. | Negative | / | Negative | Negative | *Legionella pneumophila* (278), *Mycobacterium kansasii* (12)*, Pneumocystis jirovecii* (162)*,*  *Human gammaherpesvirus 4* (18) | *Legionella pneumophila*  IgG, IgM(+), CrAg（+） |
| NO.12 | Lower Respiratory Tract Infection | Bacteria culture: candida parapsilosis | Reepithelialization and local moderate to severe atypical hyperplasia; No tumor cells were seen. | Negative | / | Negative | Negative | *Streptococcus pneumoniae* (4994)*,*  *Canidia albicans* (7)*,*  *Human gammaherpesvirus 4* (7) | Sputum culture: Canidia albicans |
| NO.13 | Lower Respiratory Tract Infection | Negative | Alveolar septal fibrous tissue mildly hyperplasia with chronic inflammatory cell infiltration and focal alveolar epithelial dysplasia; No tumor cells were seen. | Negative | Negative | Negative | Negative | Negative | Negative |
| NO.14 | Tuberculosis | Negative | Necrotic tissue and epithelioid cells, first exclude tuberculosis; No tumor cells were seen. | Negative | / | Positive | / | *Mycobacterium tuberculosis complex* (17) | Negative |
| NO.15 | Lower Respiratory Tract Infection | Negative | little mucosal tissue and blood clots; No tumor cells were seen. | Negative | Negative | Negative | Negative | *Streptococcus pneumoniae* (59)*,*  Human gammaherpesvirus 4 (34) | Negative |
| NO.16 | Lower Respiratory Tract Infection | Negative | Chronic inflammation of the mucosa; No tumor cells were seen. | Negative | / | Negative | Negative | *Streptococcus pneumoniae* (1637)*, Stenotrophomonas maltophilia* (1732), *Human betaherpesvirus 5 (25),* Human gammaherpesvirus 4 *(14)* | Negative |
| NO.17 | Lower Respiratory Tract Infection | Negative | lymphocytes and neutrophils infiltrating, and a purulent fibrinous exudate with exfoliated epithelial atypia; No tumor cells were seen. | Negative | / | Negative | Negative | Negative | Negative |
| NO.18 | Lower Respiratory Tract Infection | Negative | / | Negative | Negative | / | Negative | *Legionella pneumophila* (28) | Negative |
| NO.19 | Tuberculosis | Negative | / | Sputum: Negative  BALF: Positive (++) | / | Positive | Serum: Negative BALF: Positive | *Mycobacterium tuberculosis complex* (158) | Negative |
| NO.20 | Hematogenous disseminated tuberculosis | Negative | Chronic inflammation of mucous membrane, hyperplasia of alveolar septal fibrous tissue, acid-resistant staining negative; No tumor cells were seen. | Negative | Negative | Negative | Negative | *Acinetobacter radioresistens* (2856) | Negative |
| NO.21 | Lower Respiratory Tract Infection | Negative | Some alveoli dilate, focal alveolar septal fibrous hyperplasia; No tumor cells were seen. | Negative | Positive | Negative | Positive | *Streptococcus pneumoniae* (403) | Negative |
| NO.22 | Lower Respiratory Tract Infection | Negative | Alveolar septal fibrous tissue hyperplasia, acid-resistant staining negative, silver hexamine staining negative; No tumor cells were seen. | Negative | Negative | Negative | Negative | *Streptococcus pneumoniae* (1928), *Haemophils influenzae* (155), *Haemophilus parainfluenzae* (219) | Negative |
| NO.24 | Lower Respiratory Tract Infection | *Enterobacter cloacae complex, Klebsiella pneumoniae* | Alveolar septal fibrous hyperplasia; No tumor cells were seen. | / | / | / | Negative | *Klebsiella pneumoniae* (46) | sputum culture: *Klebsiella pneumoniae* (+++) |
| NO.27 | Lower Respiratory Tract Infection | Negative | Small airway mucosa chronic inflammation and fibrous hyperplasia, peripheral lung tissue fibroblast thrombus formed in part of alveolar cavity, chronic inflammatory cell infiltration and mild proliferation of fibrous tissue in alveolar septum, and alveolar epithelial hyperplasia | Negative | / | Negative | Negative | *Nocardia otitidiscaviarum* (68) | Negative |
| NO.28 | Tuberculosis | Negative | Acute and chronic inflammatory reaction, mild fibrosis of the kitchen interstitium, a large amount of acute inflammatory exudate, acid-resistant staining negative, silver hexamine staining negative; No tumor cells were seen. | Sputum:(++)  BALF: Positive (++) Tracheoscope brush: Negative | Positive | Positive | Positive | *Mycobacterium tuberculosis complex* (629) | Negative |
| NO.29 | Lower Respiratory Tract Infection | *Achromobacter xylosoxidans* | Chronic inflammation, pigmentation, and broken bronchial epithelium | Negative | / | Negative | Negative | *Achromobacter xylosoxidans* (77), | Negative |
| NO.30 | Lower Respiratory Tract Infection | Negative | Alveolar septal hyperplasia; No tumor cells were seen. | / | / | Negative | Negative | *Tropheryma whipplei* (4311) | *Aspergillus*  PCR (+) |
| NO.31 | Tuberculosis | Negative | Chronic inflammation with a few acute inflammatory cells infiltrating the stroma, caseous necrosis can be seen, acid fast staining and silver hexamine staining are negative, consider granulomatous inflammation, not excluding tuberculosis; No tumor cells were seen. | Tracheoscope brush: Negative BALF: Positive (+++) | Positive | Positive | / | *Mycobacterium tuberculosis complex* (365) | Negative |
| NO.32 | Lower Respiratory Tract Infection | Negative | Chronic inflammation of the mucosa with focal scaling. | Negative | Negative | Negative | Negative | *Mycobacterium abscessus* (131)*,*  *Pseudomonas aeruginosa* (13) | *Aspergillus*  IgG (+) |
| NO.33 | Lower Respiratory Tract Infection | Negative | No tumor cells were seen. | Negative | / | Negative | Negative | *Pseudomonas aeruginosa* (5515), *Human betaherpesvirus 5* (4) | Negative |
| NO.34 | Lower Respiratory Tract Infection | Negative | A small amount of chronic inflammatory cells infiltrate; No tumor cells were seen. | Negative | Negative | Negative | Negative | *Pseudomonas aeruginosa* (240)*,*  *Aspergillus fumigatus*  (23) | Negative |
| NO.36 | Lower Respiratory Tract Infection | Negative | / | Negative | Negative | Negative | Negative | Negative | *Aspergillus*  IgG (+) |
| NO.37 | Lower Respiratory Tract Infection | Negative | Chronic inflammation, local interstitial fibrous hyperplasia; No tumor cells were seen. | Negative | Weak positive | Negative | Positive | *Tropheryma whipplei* (95) | Negative |
| NO.38 | Lower Respiratory Tract Infection | Negative | Chronic inflammation with a few acute inflammatory cells scattered in the stroma and multinucleated giant cell infiltration, focal lymphoid hyperplasia, acid-resistant staining negative; No tumor cells were seen. | Negative | / | Negative | / | *Mycobacterium avium* (16) | Negative |
| NO.39 | Lower Respiratory Tract Infection | Negative | Chronic inflammation, interstitium scattered with a few acute inflammatory cell infiltration, part of the alveolar septa widened, fibrous tissue proliferation, acid-resistant staining negative; No tumor cells were seen. | Negative | Positive | / | Weak positive | *Streptococcus pneumoniae* (153),*Nocardia*  *transvalensis*  (25), *Nocardia* *Mexicana* (17) | Negative |
| NO.40 | Pulmonary cryptococcosis | Negative | Chronic inflammation, mechanical pneumonia, scattered multinucleated giant cells, nucleated round microorganisms could be seen in the cytoplasm, silver hexamine staining positive, acid-fast staining negative, combined with clinical, consistent with cryptococcus infection | Negative | Negative | Negative | Positive | *Cryptococcus neoformans* (16) | CrAg（+） |
| NO.41 | Pulmonary cryptococcosis | Negative | Chronic inflammation, alveolar septum widening, fibrous tissue hyperplasia, focal multiple lymphocyte infiltration, fibroblast thrombus formation in individual alveolar cavity, acid-resistant, silver hexamine and PAS staining were negative; No tumor cells were seen. | Negative | / | Negative | Negative | Negative | CrAg（+）, *cryptococcus* PCR(+) |
| NO.42 | Lower Respiratory Tract Infection | *Candida lusitaniae* | / | Negative | Negative | Negative | Negative | *Chlamydophila psittaci* (1740), *Candida lusitaniae*  (6) | Negative |
| NO.43 | Lower Respiratory Tract Infection | Negative | No tumor cells were seen. | Negative | Negative | Negative | Negative | *Haemophilus influenzae* (46)*,*  *Haemophilus parainfluenzae* (1270) | Negative |
| NO.44 | Tuberculosis, Pneumonia | Negative | Chronic inflammation, mild hyperplasia of some alveolar septal fibers, alveolar type II epithelial hyperplasia, acid-resistant negative; No tumor cells were seen. | Negative | Positive | Negative | Positive | Negative | sputum culture: *Klebsiella pneumoniae*  *Mycobacterium tuberculosis PCR (+)*  *PPD+++* |
| NO.45 | Tuberculosis, Pulmonary infection | Negative | Chronic inflammation, interstitial infiltration of numerous lymphocytes and histiocytes, local fibrous hyperplasia, acid-resistant negative; No tumor cells were seen. | Negative | Positive | Positive | Positive | *Streptococcus pneumoniae* (64) | *Mycobacterium tuberculosis PCR (+)* |
| NO.46 | Lower Respiratory Tract Infection | Negative | Alveolar septal fibrous hyperplasia, carbon deposition, focal alveolar epithelial hyperplasia, acid-resistant negative; No tumor cells were seen. | Negative | Negative | Negative | Negative | Negative | Negative |
| NO.47 | Lower Respiratory Tract Infection | Negative | Chronic inflammation, partial alveolar septa widening, fibrous tissue hyperplasia, local interstitial small focal lymphocyte infiltration, small focal alveolar epithelial hyperplasia; No tumor cells were seen. | Negative | Negative | Negative | Negative | Negative | Negative |
| NO.48 | Lower Respiratory Tract Infection | Negative | Fibrous hyperplasia accompanied by inflammatory cell infiltration, bleeding and inflammatory exudate were also observed, acid-resistant staining negative; No tumor cells were seen. | Negative | / | Negative | / | *Schizophyllum commune* (24) | Negative |
| NO.49 | Lower Respiratory Tract Infection | Negative | Small necrotic tissue, hyperplasia of fibrous tissue and a few peripheral tissues, immunohistochemical staining showed positive CEA of some cells in necrotic tissue, but tumor cells were not excluded. Focal examination of fibrous connective tissue showed a small number of signed-ring like cells, positive CK7, CEA, TTF-1, Ki-67, prone to adenocarcinoma | Negative | / | Negative | Negative | *Streptococcus mitis* (237), *Streptococcus pneumoniae* (217) | Negative |
| NO.50 | Tuberculosis | Negative | little degeneration of necrotic epithelium, acid-resistant staining negative; No tumor cells were seen. | Negative | / | Positive | Positive | *Stenotrophomonas maltophilia* (92) | Negative |
| NO.51 | Lower Respiratory Tract Infection | Negative | / | Negative | Negative | Negative | Negative | Negative | sputum culture: *Klebsiella pneumoniae* (+++) |
| NO.53 | Lower Respiratory Tract Infection | Negative | Alveolar septa with chronic inflammatory cell infiltration and fibrous tissue hyperplasia, local alveolar epithelial hyperplasia, a few foam cells in some alveolar cavities, and alveolar cavity collapse in local lung tissues; No tumor cells were seen. | Negative | Negative | Negative | Negative | Negative | Negative |
| NO.54 | Lower Respiratory Tract Infection | Negative | Chronic inflammation in small airway mucosa, alveolar septal fibrous hyperplasia in peripheral lung tissue with inflammatory cell infiltration and partial alveolar intra - luminal hemorrhage; No tumor cells were seen. | Negative | / | Negative | Negative | Negative | Negative |
| NO.55 | Lower Respiratory Tract Infection | Negative | Chronic inflammation in lung tissue, alveolar septa widening, fibrous tissue hyperplasia, alveolar epithelial hyperplasia, focal multiple tissue cell aggregation; No tumor cells were seen. | Negative | Weak positive | Negative | Negative | Negative | Negative |
| NO.56 | Lower Respiratory Tract Infection | Negative | Inflammatory cells. | / | / | / | / | Negative | Negative |
| NO.58 | Tuberculosis | Negative | Granulomatous lesions with necrotic tissue are considered tuberculosis first, acid-resistant staining negative; No tumor cells were seen. | Negative | / | Positive | Positive | *Mycobacterium tuberculosis complex* (8) | Negative |
| NO.59 | Lower Respiratory Tract Infection | Negative | / | Negative | Negative | Negative | Negative | *Streptococcus pneumoniae* (105), *Human betaherpesvirus 5 (9)* | *Human cytomegalovirus IgM* (+) |
| NO.62 | Lower Respiratory Tract Infection | Negative | Alveolar septal hyperplasia; No tumor cells were seen. | Negative | / | Negative | Positive | *Haemophilus influenzae* (43), *Haemophilus parainfluenzae* (361), *Streptococcus pneumoniae* (97) | Negative |
| No.65 | Tuberculosis | Negative | / | Negative | / | Positive | Negative | *Mycobacterium tuberculosis complex* (6) | Negative |
| NO.66 | Lower Respiratory Tract Infection | Negative | / | Negative | / | Negative | Weak Positive | *Streptococcus pneumoniae* (115), *Aspergillus fumigatus* (60) | Negative |
| NO.67 | Lower Respiratory Tract Infection | Negative | Chronic inflammatory cell infiltration, septal fibrous hyperplasia, occasional calcification, local alveolar epithelial hyperplasia. | Negative | Negative | Negative | Negative | Negative | Negative |
| NO.68 | Pulmonary cryptococcosis | Negative | / | Negative | / | Negative | Negative | *Cryptococcus neoformans* (7) | CrAg（+） |
| NO.70 | Pulmonary cryptococcosis | *Streptococcus pneumoniae* | Granulomatous lesions, silver hexamine and PAS staining occasionally positive, acid-resistant staining negative, supporting fungal infection; No tumor cells were seen. | Negative | / | Negative | Negative | *Streptococcus pneumoniae* (17) | CrAg（+） |
| NO.71 | Lower Respiratory Tract Infection | Negative | Fibrous tissue was hyperplasia with carbon dust deposition. Phagocytic macrophages containing hemosiderin could be seen in some alveolar cavities; No tumor cells were seen. | Negative | Negative | / | Negative | Negative | Negative |
| NO.72 | Lower Respiratory Tract Infection | Negative | Chronic inflammation of the mucosa, acid-resistant staining negative; No tumor cells were seen. | Negative | / | Negative | Negative | *Klebsiella pneumoniae* (9094) | Negative |
| NO.73 | Lower Respiratory Tract Infection | Negative | Chronic inflammation of the mucosa with fibrosis and calcification, as well as blood clots and tissue cell aggregation; No tumor cells were seen. | Negative | / | Negative | Negative | *Pseudomonas aeruginosa* (15) | *Legionella pneumophila* IgM (+) |
| NO.74 | Tuberculosis | Negative | Chronic inflammation accompanied by acute inflammatory reaction, local alveolar septal fibrous hyperplasia, several pieces of free coagulated necrotic tissue were observed, no granuloma formation was observed, tuberculosis was not excluded, acid-resistant staining was suspiciously positive; No tumor cells were seen. | Negative | Positive | Positive | Negative | *Mycobacterium tuberculosis complex* (1105) | Negative |
| NO.75 | Secondary tuberculosis | Negative | Organizing pneumonia, with small patches of necrosis and occasional multinucleated giant cells surrounding the necrosis, acid-resistant staining negative; No tumor cells were seen. | Sputum: Negative  BALF: Positive (++) Tracheoscope brush: Negative | / | Positive | Positive | *Mycobacterium tuberculosis complex* (254) | Negative |
| NO.76 | Lower Respiratory Tract Infection | *Pseudomonas aeruginosa* | Mucous plasma cells and neutrophils infiltrate with lymphoid hyperplasia; No tumor cells were seen. | Negative | Negative | Negative | Negative | *Pseudomonas aeruginosa* (1413) | Sputum culture: *Pseudomonas aeruginosa* |
| NO.77 | Pulmonary aspergillosis, Secondary tuberculosis | Negative | / | Negative | / | Positive | / | *Mycobacterium tuberculosis complex* (2), *aspergillus flavus* (7) | *Aspergillus*  IgG: Weak positive |
| NO.79 | Lower Respiratory Tract Infection | Negative | Chronic inflammation with a small amount of acute inflammatory cell infiltration, atypical granuloma formation, interstitial fibrous hyperplasia, local alveolar epithelial dysplasia; No tumor cells were seen. | Negative | Negative | Negative | Negative | *Nocardia abscessus* (17) | Negative |
| NO.81 | Lower Respiratory Tract Infection | Negative | No tumor cells were seen. | Negative | / | Negative | Negative | *Mycobacterium avium* (9) | sputum culture: *Enterobacter cloacae* (++) |
| NO.83 | Lower Respiratory Tract Infection | Negative | Alveolar septal hyperplasia; No tumor cells were seen. | Negative | Positive | Negative | Negative | *Tropheryma whipplei* (15428) | Negative |
| NO.84 | Lower Respiratory Tract Infection | *Pseudomonas aeruginosa* | / | Negative | / | Negative | Negative | *Pseudomonas aeruginosa* (35558) | sputum culture: *Pseudomonas aeruginosa* (+++) |
| NO.85 | Tuberculosis, Pulmonary infection | Negative | Granulomatous lesions with little coagulative necrosis, not typical caseous necrosis, acid-resistant staining negative; No tumor cells were seen. | Negative | Positive | Positive | Negative | *Mycobacterium tuberculosis complex* (5), *Pseudomonas aeruginosa* (142) | tuberculosis antibody: weak positive |
| NO.86 | Lower Respiratory Tract Infection | Negative | Alveolar septal hyperplasia with chronic inflammatory cell infiltration, focal alveolar epithelial hyperplasia; No tumor cells were seen. | Negative | Positive | Negative | Serum: Negative  BALF: weak positive | Negative | Negative |
| NO.87 | Pulmonary cryptococcosis | Negative | Focal alveolar septa were widened with fibrous hyperplasia; No tumor cells were seen. | Negative | Negative | Negative | Serum: Negative  BALF: Positive | *Cryptococcus neoformans* (117) | CrAg（+） |
| NO.91 | Lower Respiratory Tract Infection | *Nocardia pekinensis* | Chronic inflammation; No tumor cells were seen. | Negative | / | / | Negative | *Nocardia niwae* (228)*, Nocardia abscessus* (166) | Negative |
| NO.94 | Lower Respiratory Tract Infection | *Pseudomonas aeruginosa* | No tumor cells were seen. | Negative | / | Negative | Negative | *Pseudomonas aeruginosa* (12027) | Negative |
| NO.95 | Lower Respiratory Tract Infection | *Aspergillus fumigatus* | No tumor cells were seen. | Negative | / | Negative | Serum: Negative  BALF: Positive | *Cryptococcus neoformans* (210), *Aspergillus fumigatus* (49) | *Aspergillus*  IgG (+) |
| NO.96 | Tuberculosis, Pulmonary infection | Negative | / | Negative | / | Positive | Negative | *Mycobacterium tuberculosis complex* (20), *mycobacterium intracellulare* (4), *Human betaherpesvirus 5* (4) | Negative |
| NO.97 | Tuberculosis | Negative | Granulomatous lesions are seen here with caseous necrosis. acid-resistant staining negative, consider tuberculosis; No tumor cells were seen. | Sputum: Negative  BALF: Positive (++) Tracheoscope brush: Negative | Positive | Positive | Serum: Positive  BALF: Negative | *Mycobacterium tuberculosis complex* (683) | Negative |
| NO.98 | Lower Respiratory Tract Infection | Negative | Alveolar septal fibrous tissue hyperplasia with acute and chronic inflammatory cell infiltration, fibroblast thrombus formation in part of alveolar cavity; No tumor cells were seen. | Negative | / | Negative | Negative | Negative | Negative |
| NO.99 | Lower Respiratory Tract Infection | Negative | No tumor cells were seen. | / | / | / | Negative | *Haemophilus influenzae* (125), *Canidia albicans* (20), *Pneumocystis jirovecii* (2) | Sputum culture: *Canidia albicans* |
| NO.101 | Lower Respiratory Tract Infection | *Acinetobacter ursingii* | Chronic inflammation, interstitial granuloma formation, alveolar septal fibrous hyperplasia; Granulomatous lesions, no caseous necrosis, sarcoidosis is not excluded; No tumor cells were seen. | Negative | Negative | Negative | Negative | *Acinetobacter ursingii* (1031) | Negative |
| NO.105 | Lower Respiratory Tract Infection | *Serratia marcescens* | Chronic inflammation with acute inflammatory reaction and fibrous hyperplasia, free mucus, columnar epithelium and goblet cells, and numerous eosinophils are also seen; No tumor cells were seen. | Negative | Negative | Negative | Negative | *Serratia marcescens* (4423), *Stenotrophomonas maltophilia* (3922) | Negative |
| NO.106 | Lower Respiratory Tract Infection | Negative | Only a few myxoid substances were seen. | Negative | / | Negative | Negative | Negative | Negative |

Abbreviations: BALF, bronchoalveolar lavage fluid; Xpert, xpertmycobacterium tuberculosis /rifampicin resistance; MTB, mycobacterium tuberculosis; GM, galactomannan; PAS, periodic acid-Schiff; CrAg, cryptococcus capsular polysaccharide antigen; PPD, tuberculin protein purified derivative.

Notes：“/” means “no examination”. Patients with tuberculosis infection are shown in blue and those with cryptococcus infection are shown in purple.
